# Supplementary material
Source: ML conference proceedings conference paper supplement (https://openreview.net/forum?id=pffPeV7GNR)
Supplement: supplementary_material [file attachment]

# Supplementary Materials: Learning Cross-Spectral Prior for Image Super-Resolution

Anonymous Authors

## 1 MORE EXPERIMENTAL RESULTS

Table 1 reports the experimental results about the number ( $T$ ) of DMF modules in the CSPSR model. More DMF modules result in better SR results. However, as the number of DMF modules increases, the improvement degree decreases.

We also demonstrate the performance of different SR models in the ablation study on the cross-spectral stereo matching task, the RMSE results of which on the test images of the video ‘0224\_0742’ from the RGB-NIR stereo dataset are shown in Figure 1.

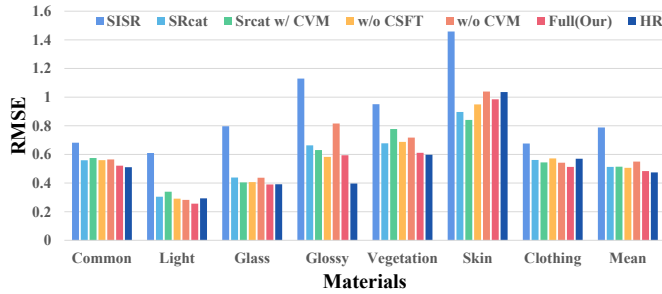

**Figure 1: Quantitative comparison of the ablation study on the cross-spectral disparity prediction task. The disparity RMSE in pixels for different materials on ‘0224\_0742’ of the RGB-NIR stereo dataset [8].**

Figure 2 demonstrates that the proposed CSPSR outperforms the state-of-the-art SISR models and produces more accurate SR results of the left VIS images, especially for image areas with high brightness, with gains over 3dB for a scale 4.

Figure 3 demonstrate the quantitative and visual comparison on  $\times 4$  SR.

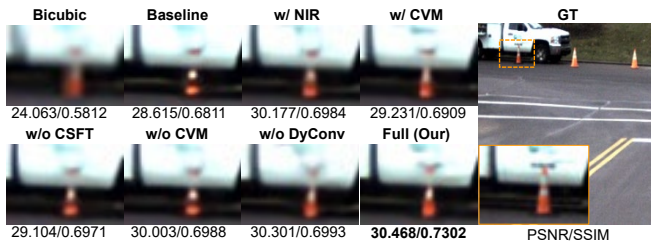

**Figure 4: Visual SR results of the ablation study. Compared with the ‘w/o CSFT’, which generates blurred textures, and the ‘w/o CVM’, which produces some artefacts, our final model ‘Full’ achieves the best visual results with fine details.**

Figure 4 demonstrates the SR results of the ablation study.

## REFERENCES

- [1] M. Brown and S. Süssstrunk. 2011. Multispectral SIFT for Scene Category Recognition. In *IEEE/CVF Conference on Computer Vision and Pattern Recognition (CVPR)*. 177–184.
- [2] Xintao ; Zhou Jiantao ; Qiao Yu ; Dong Chao Chen, Xiangyu ; Wang. 2023. Activating More Pixels in Image Super-Resolution Transformer. In *IEEE/CVF Conference on Computer Vision and Pattern Recognition (CVPR)*.
- [3] Xiaojie Chu, Liangyu Chen, and Wenqing Yu. 2022. NAFSSR: Stereo Image Super-Resolution Using NAFNet. In *IEEE/CVF Conference on Computer Vision and Pattern Recognition Workshops (CVPRW)*. 1238–1247. <https://doi.org/10.1109/CVPRW56347.2022.00130>
- [4] Xin Tao Jiangbo Lu Liying Lu, Wenbo Li and Jiaya Jia. 2021. MASA-SR: Matching Acceleration and Spatial Adaptation for Reference-Based Image Super-Resolution. In *IEEE Conference on Computer Vision and Pattern Recognition (CVPR)*.
- [5] Bin Xia, Yucheng Hang, Yapeng Tian, Wenming Yang, Qingmin Liao, and Jie Zhou. 2022. Efficient Non-Local Contrastive Attention for Image Super-Resolution. In *Association for the Advancement of Artificial Intelligence (AAAI)*.
- [6] Longguang Wang Xiaoyu Dong, Naoto Yokoya and Tatsumi Uezato. 2022. Learning Mutual Modulation for Self-Supervised Cross-Modal Super-Resolution. In *European Conference on Computer Vision (ECCV)*.
- [7] Yuqian Zhou Yiqun Mei, Yuchen Fan. 2021. Image Super-Resolution with Non-Local Sparse Attention. In *IEEE/CVF Conference on Computer Vision and Pattern Recognition (CVPR)*.
- [8] Tiancheng Zhi, Bernardo R. Pires, Martial Hebert, and Srinivasa G. Narasimhan. 2018. Deep Material-Aware Cross-Spectral Stereo Matching. In *IEEE/CVF Conference on Computer Vision and Pattern Recognition (CVPR)*. 1916–1925. <https://doi.org/10.1109/CVPR.2018.00205>

**Table 1: Experimental results about the number ( $T$ ) of DMF modules in the CSPSR model. The  $\times 4$  SR results (average PSNR $\uparrow$ /SSIM $\uparrow$ ) of visible images on the RGBNIRStereo dataset.**

| $T$ | '0224_0742'          | '0222_0951'          | '0222_1423'          | '0223_1639'          |
|-----|----------------------|----------------------|----------------------|----------------------|
| 1   | 26.247/0.6398        | 28.265/0.7922        | 26.887/0.7882        | 23.955/0.5937        |
| 5   | 27.063/0.6647        | 28.992/0.8051        | 27.267/0.8041        | 24.080/0.6101        |
| 10  | 27.460/0.6924        | 29.075/0.8124        | 27.759/0.8105        | 25.451/0.6583        |
| 15  | <b>27.615/0.6980</b> | <b>29.525/0.8188</b> | <b>28.210/0.8178</b> | <b>25.708/0.6630</b> |

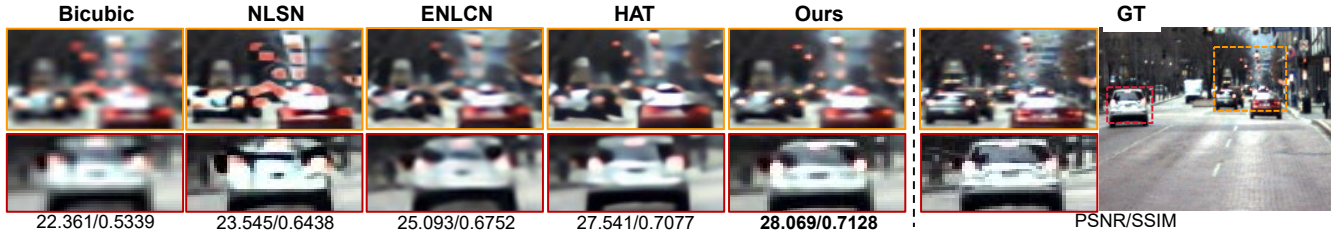

**Figure 2: Visual comparison with the state-of-the-arts (NLSN [7], ENLCN [5], HAT [2]). The  $\times 4$  VIS SR results on the RGB-NIR stereo [8] and NIRScene [1] datasets.**

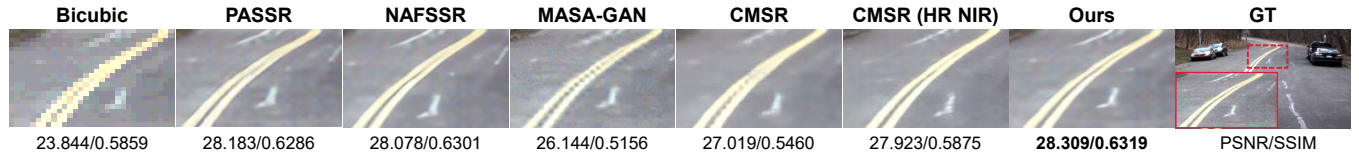

**Figure 3: Visual comparison with the prior-guided SR methods, including StereoSR (NAFSSR [3]), reference-based SR (MASA [4]), and multi-modal SR (CMSR [6]) methods.**
